# Supplementary material for: Preferential Recruitment of Monocyte into the Brain is Orchestrated by VCAM-1 Expression
Source: Preprints.org preprint supplement (doi:10.20944/preprints202306.0649.v1), 2023-06-08
Supplement: Supplementary file 1 [file supplementary]

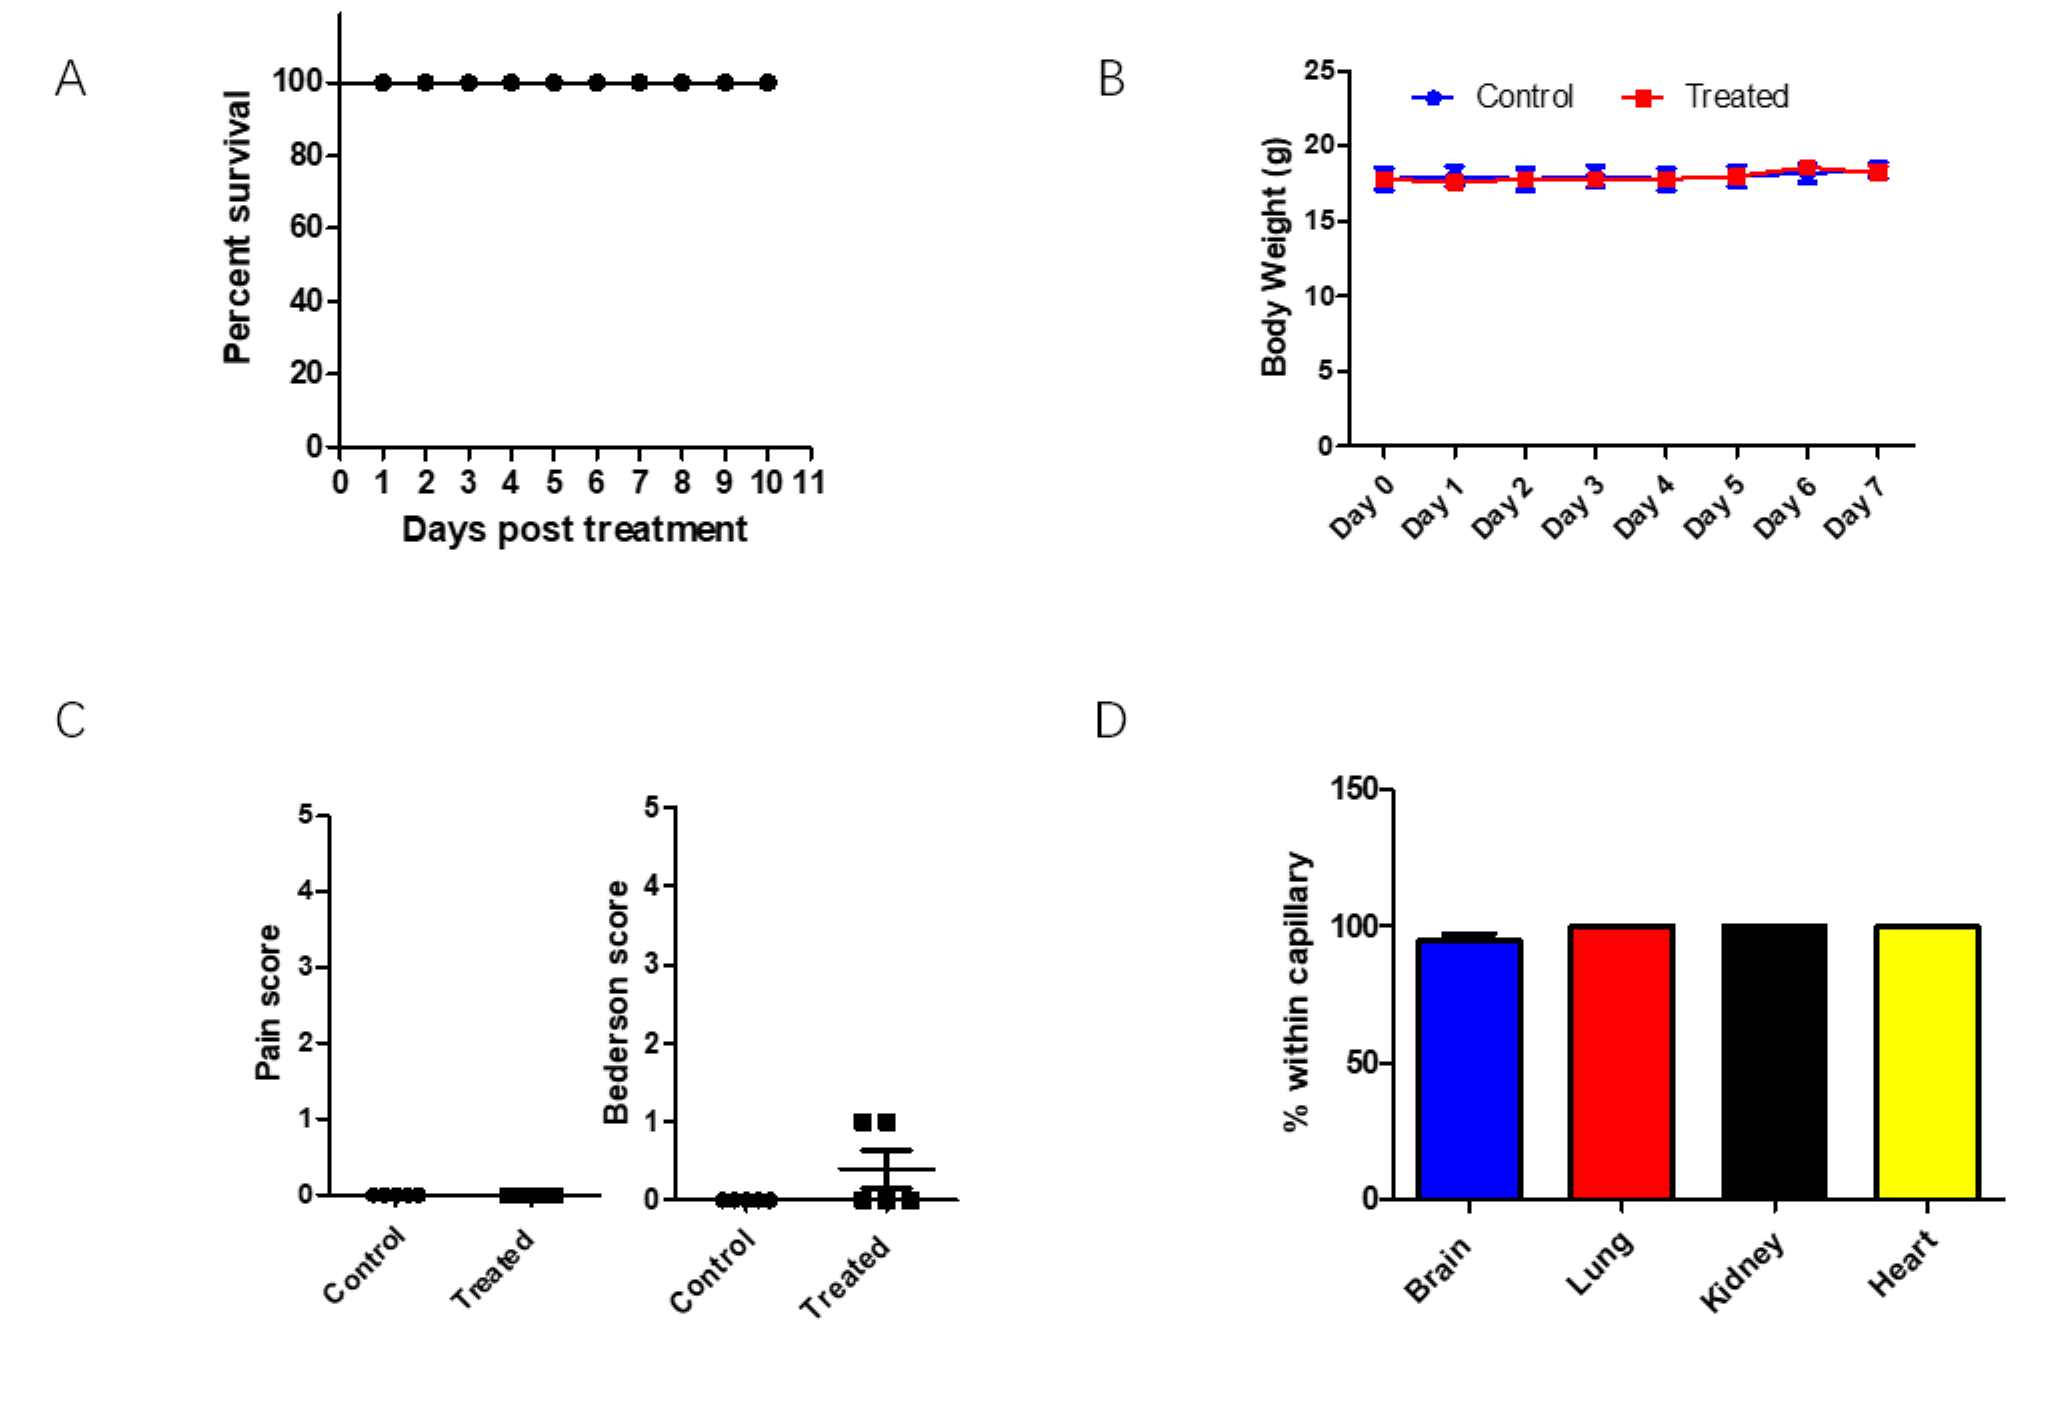


**Figure S1 Mouse behavior after microsphere treatment.**

(A) The survival of mice after treatment with 5x106 6 m microspheres from the tail vein.

(B) The daily body weight change of mice with or without treatment with 5x106 6 m microspheres from the tail vein.

(C) The pain score and neurological evaluation Bederson score of mice after treatment with 5x106 6 m microspheres from the tail vein.

(D) The percentage of microspheres within capillary after 7 days.


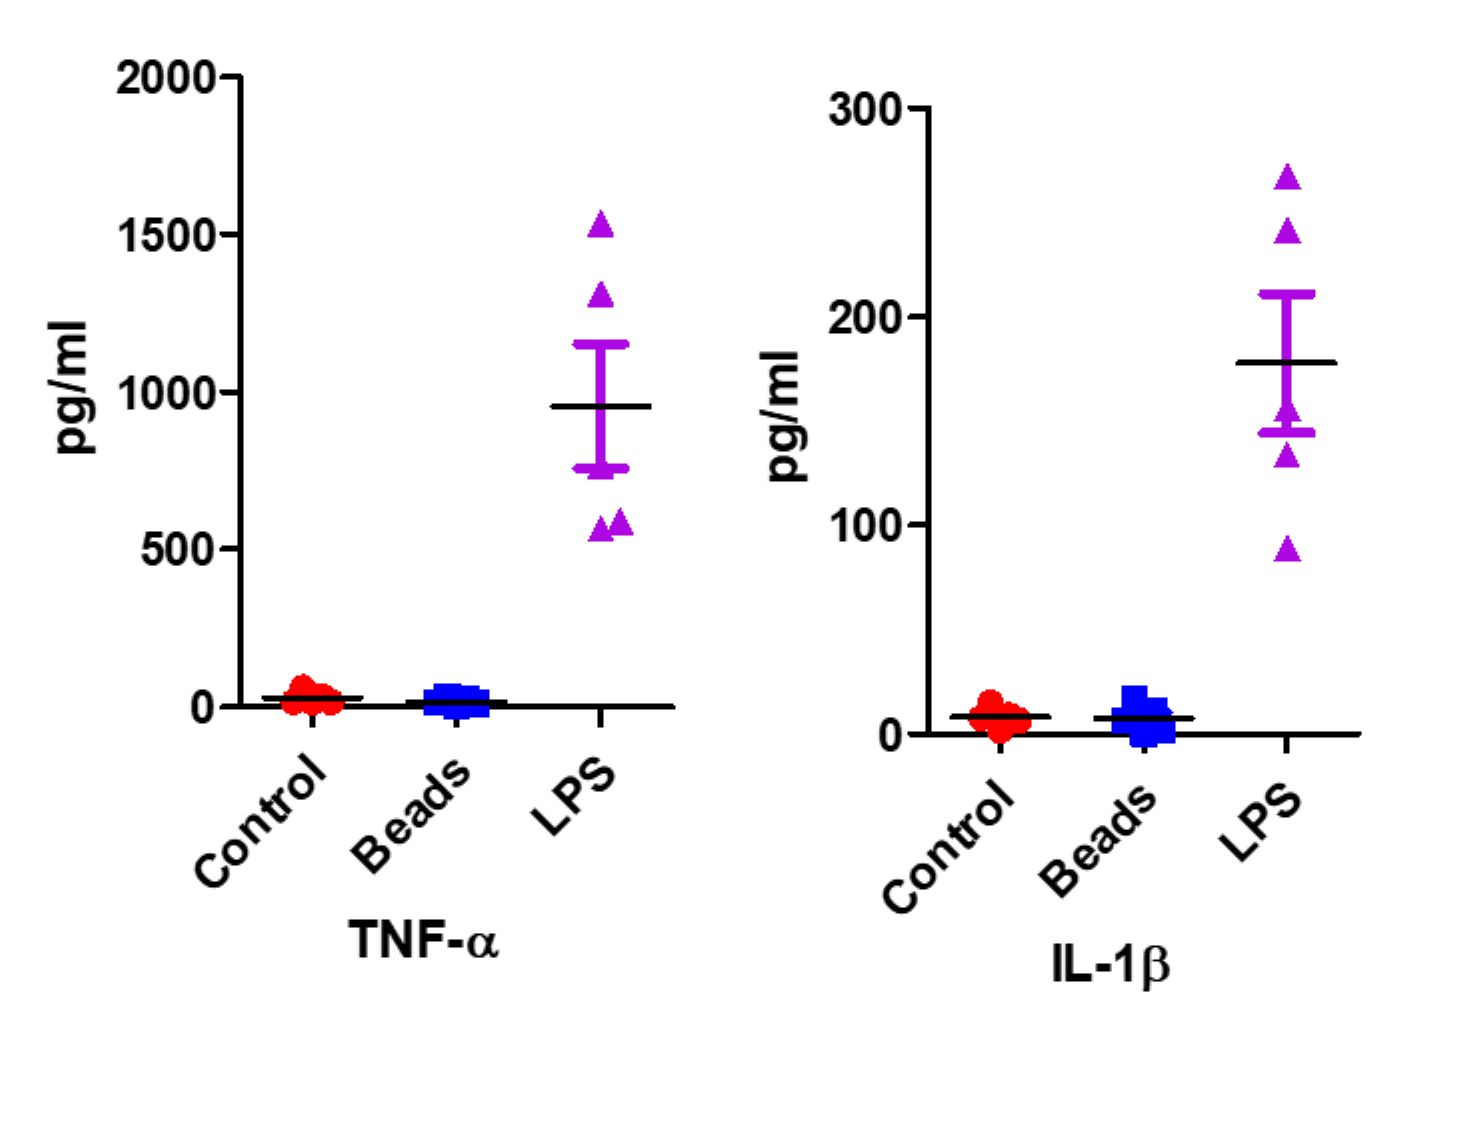


**Figure S2 The detection of TNF- and IL-1production using ELISA. 10 g/ml final concentration of LPS was used as control.**


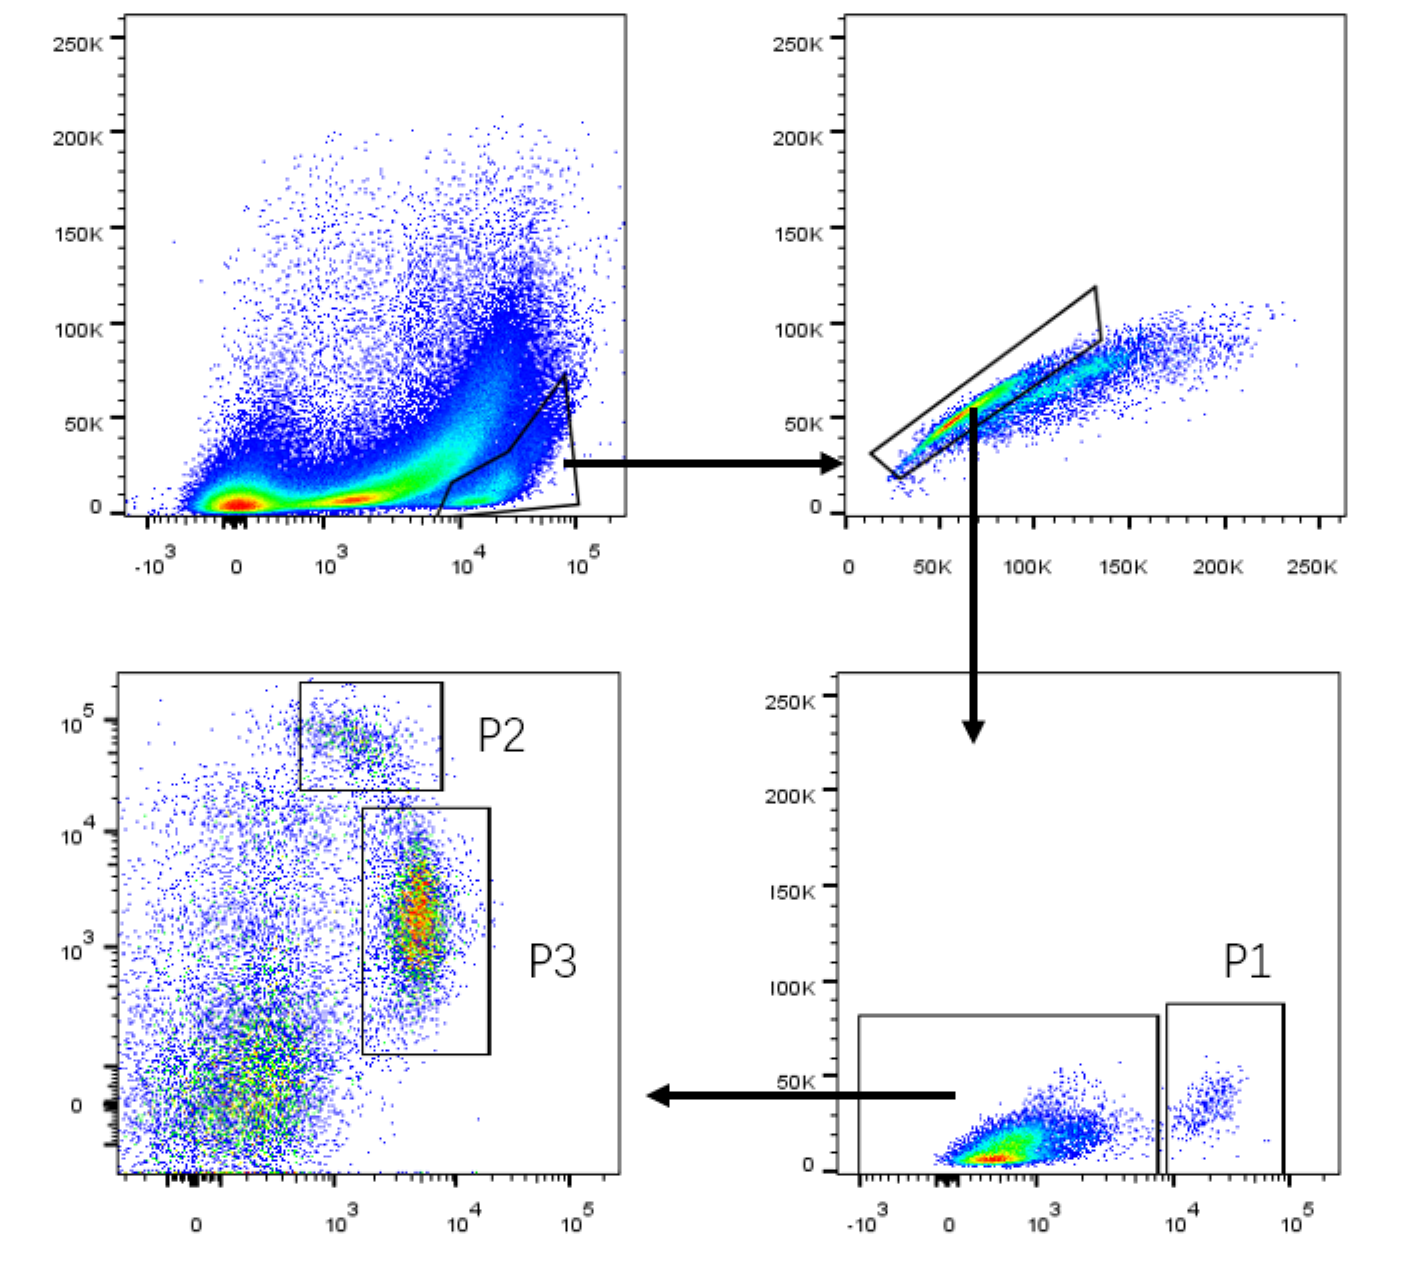


**Figure S3 The gating strategy for neutrophil P1, Ly6Chi monocyte P2 and Ly6Clo monocyte P3.**


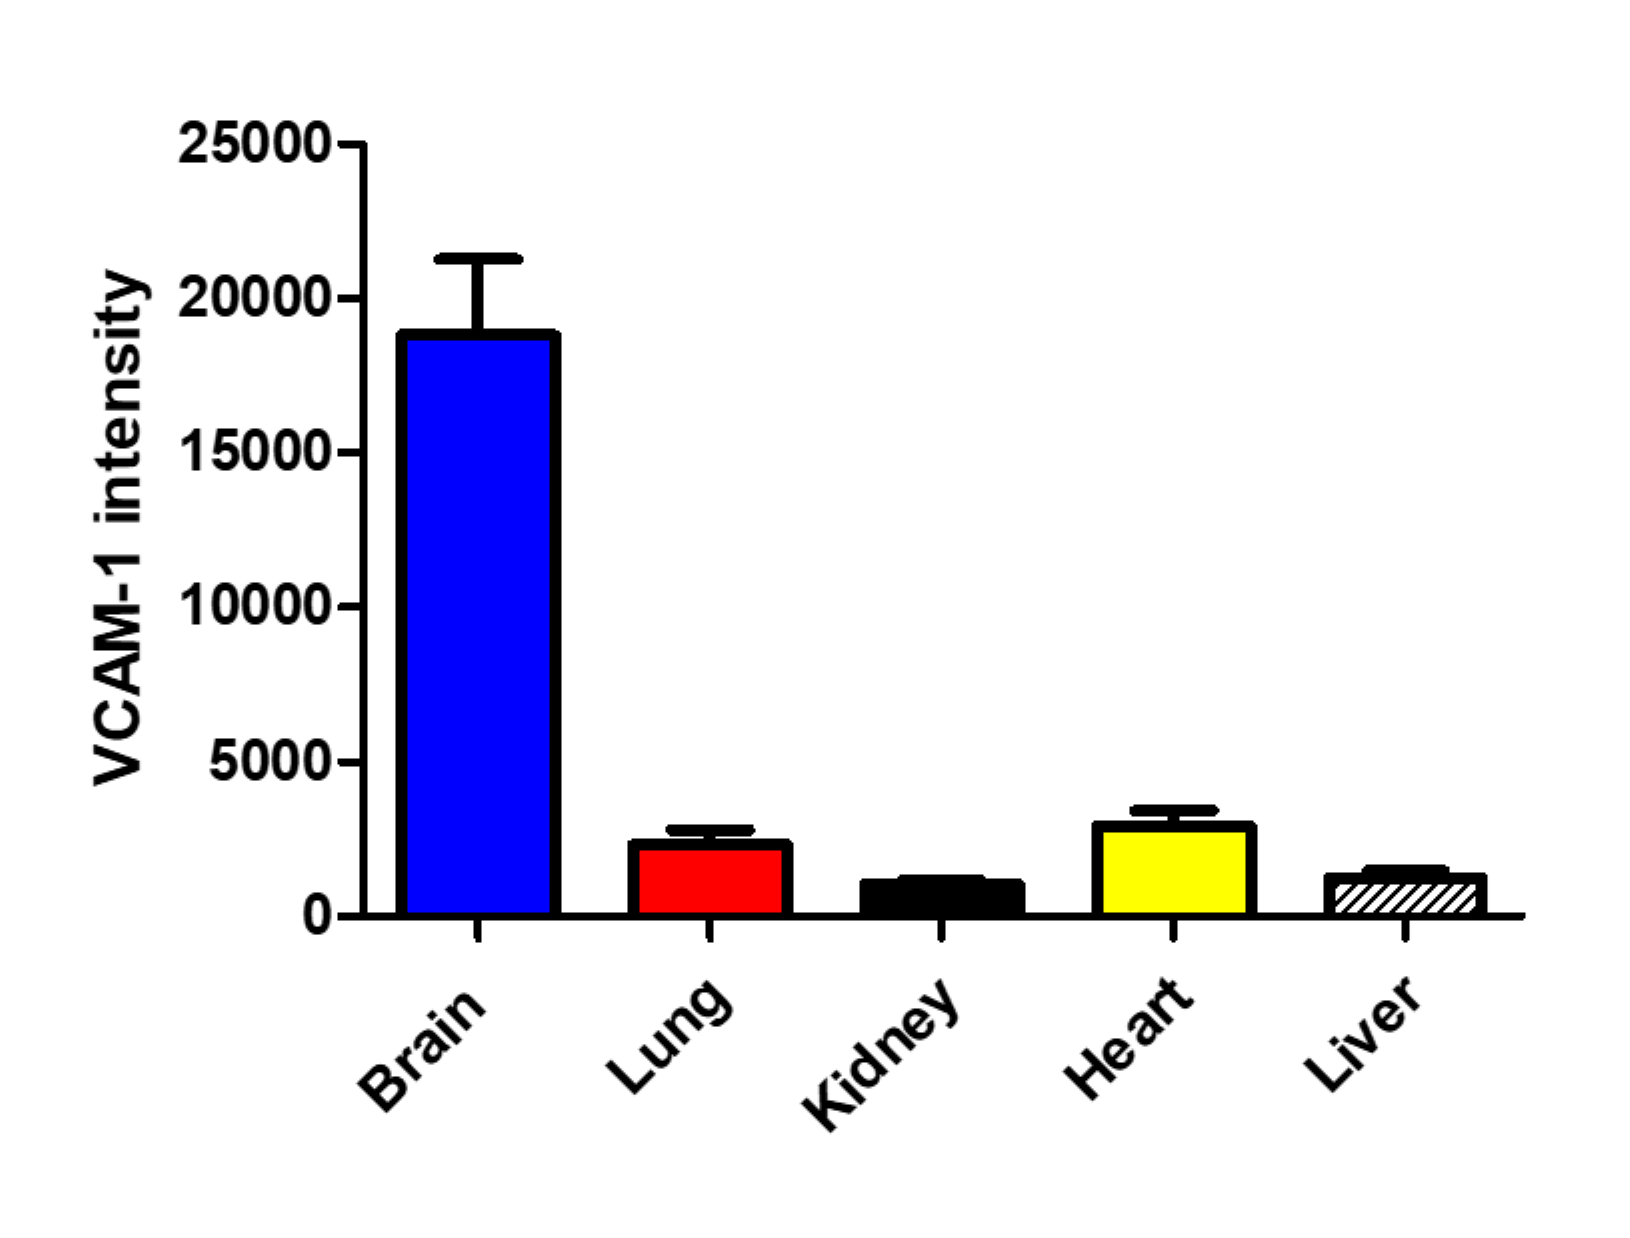


**Figure S4 The VCAM-1 intensity on different organs studied by fluorescence microscope.**


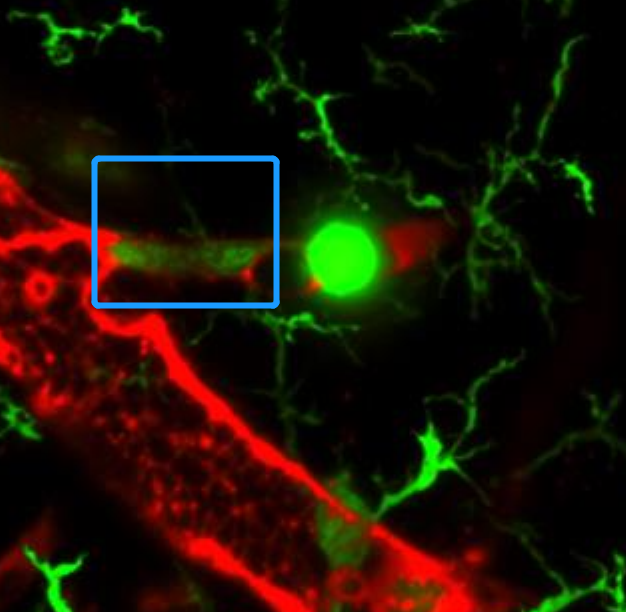


**Figure S4 Monocytes were frequently seen approaching the microsphere**
